# Supplementary material
Source: publisher figshare collection journal article supplement (https://rs.figshare.com/ndownloader/files/8901733)
Supplement: Supplementary file 1 [file 8901733]

**
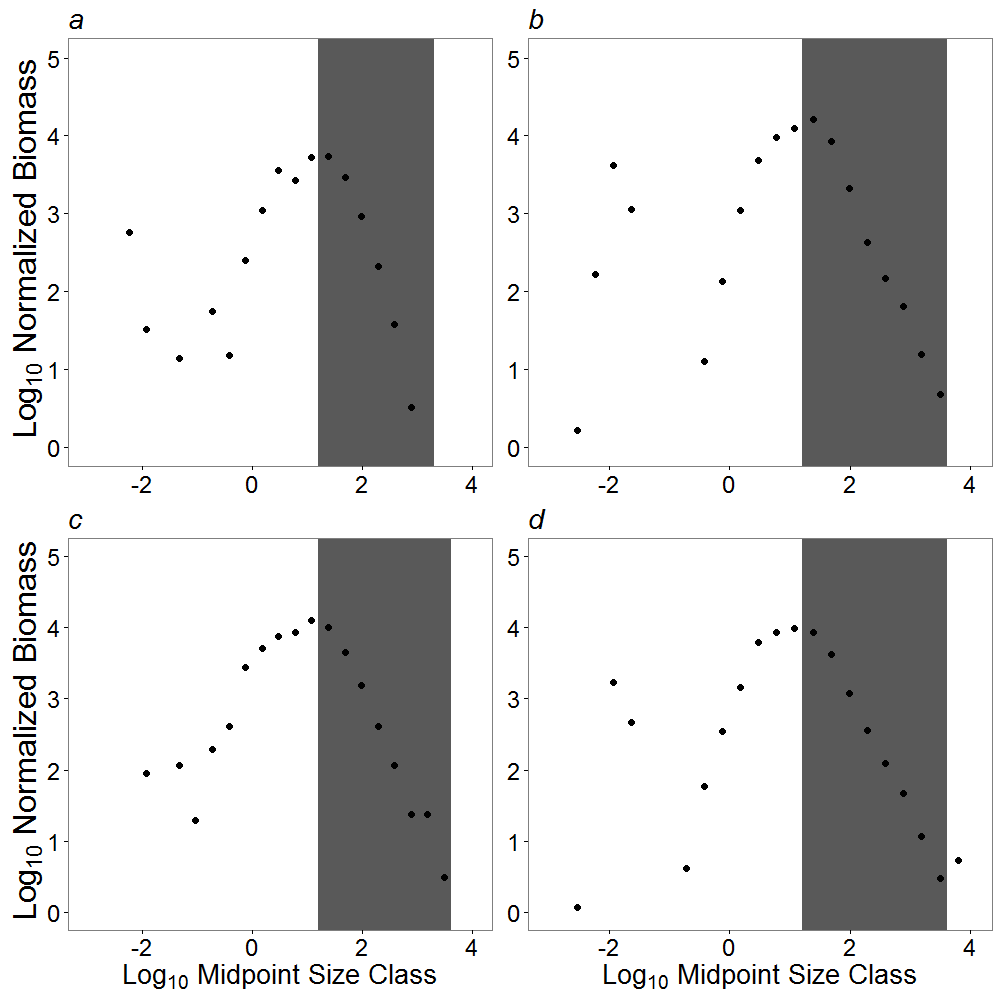
**

**Figure S1.** Log10 normalized biomass plotted against log10 midpoint size class for the entire size range of trawl catch. Range used in this study marked by grey rectangle. a: Non-indigenous species in the years 1990-1994. b: Indigenous species in the years 1990-1994. c: Non-indigenous species in the years 2008-2012. d: Indigenous species in the years 2008-2012. The increase in biomass with size for species <8g is associated with net size-selectivity.
